# Supplementary material
Source: publisher figshare collection journal article supplement (https://acs.figshare.com/ndownloader/files/4615063)
Supplement: Supplementary file 1 [file 4615063]

#######################################################################
#
#                 Cambridge Crystallographic Data Centre
#                                CCDC 
#
#######################################################################
#
# If this CIF has been generated directly or indirectly from an entry in the 
# Cambridge Structural Database, then it will include bibliographic, chemical, 
# crystal, experimental, refinement or atomic coordinate data resulting from 
# the CCDC's data processing and validation procedures. Files generated from 
# CSD entries are Copyright 2008 Cambridge Crystallographic Data Centre. They 
# may be used in bona fide research applications only, and may not be copied or 
# further disseminated in any form, whether machine-readable or not, except for 
# the purposes of generating routine backup copies on your local computer 
# system.
# 
# Files arising from any other source may also contain material that is the 
# copyright of third parties, including the originator, and you should check 
# with the originator concerning the permitted uses of the information 
# contained in this CIF.
#
# For further information on the CCDC and the free tools enCIFer and Mercury
# for validating and visualising CIF files, please visit www.ccdc.cam.ac.uk
#
#######################################################################

data_1
_symmetry_cell_setting           monoclinic
_symmetry_space_group_name_H-M   'C 2/c'
_symmetry_Int_Tables_number      15
loop_
_symmetry_equiv_pos_site_id
_symmetry_equiv_pos_as_xyz
1 x,y,z
2 -x,y,1/2-z
3 1/2+x,1/2+y,z
4 1/2-x,1/2+y,1/2-z
5 -x,-y,-z
6 x,-y,1/2+z
7 1/2-x,1/2-y,-z
8 1/2+x,1/2-y,1/2+z
_cell_length_a                   31.180(8)
_cell_length_b                   8.357(2)
_cell_length_c                   9.340(3)
_cell_angle_alpha                90.00
_cell_angle_beta                 105.215(4)
_cell_angle_gamma                90.00
_cell_volume                     2348.43
loop_
_atom_site_label
_atom_site_type_symbol
_atom_site_fract_x
_atom_site_fract_y
_atom_site_fract_z
Fe1 Fe 0.082271(8) 0.23305(3) 0.73697(3)
S1 S 0.183681(13) 0.18754(5) 0.98411(4)
O1 O 0.18346(4) 0.33799(15) 1.06050(14)
O2 O 0.20480(4) 0.19194(18) 0.86471(15)
O3 O 0.20059(4) 0.06079(16) 1.09171(15)
C1 C 0.12835(5) 0.1357(2) 0.90671(18)
C2 C 0.09134(6) 0.1863(2) 0.95697(19)
H2B H 0.0917 0.2665 1.0367
C3 C 0.05376(6) 0.1033(2) 0.8719(2)
H3B H 0.0226 0.1158 0.8802
C4 C 0.06744(6) 0.0022(2) 0.7706(2)
H4A H 0.0476 -0.0693 0.6958
C5 C 0.11387(6) 0.0214(2) 0.79132(19)
H5A H 0.1328 -0.0349 0.7358
C6 C 0.11150(7) 0.4188(2) 0.6593(2)
H6A H 0.1429 0.4558 0.7000
C7 C 0.07409(7) 0.4730(2) 0.7052(2)
H7A H 0.0744 0.5546 0.7837
C8 C 0.03641(6) 0.3909(2) 0.6204(2)
H8A H 0.0053 0.4036 0.6288
C9 C 0.05036(6) 0.2862(2) 0.5229(2)
H9A H 0.0308 0.2122 0.4500
C10 C 0.09689(6) 0.3030(2) 0.5474(2)
H10A H 0.1160 0.2436 0.4944
C12 C 0.29030(6) 0.1653(2) 0.5651(2)
H12A H 0.3061 0.0636 0.5980
H12B H 0.3124 0.2530 0.5856
C11 C 0.23172(6) 0.3424(2) 0.5992(2)
H11A H 0.2523 0.4348 0.6207
H11B H 0.2089 0.3574 0.6543
N1 N 0.25663(5) 0.19305(18) 0.64851(16)
H1A H 0.2372 0.1081 0.6341
H1B H 0.2705 0.1996 0.7483
C12 C 0.2097 0.3347 0.4349
H12A H 0.1939 0.4364 0.402
H12B H 0.1876 0.247 0.4144
C11 C 0.26828 0.1576 0.4008
H11A H 0.2477 0.0652 0.3793
H11B H 0.2911 0.1426 0.3457
N1 N 0.24337 0.30695 0.35149
H1A H 0.2628 0.3919 0.3659
H1B H 0.2295 0.3004 0.2517

#END
